# Supplementary material for: A terbium metal–organic framework with stable luminescent emission in a wide pH range that acts as a quantitative detection material for nitroaromatics
Source: Royal Society of Chemistry journal article supplement (doi:10.1039/c5ra06308f), 2015-01-01
Supplement: c5ra06308f1.pdf [file c5ra06308f1.pdf]

## Supporting Information

### A terbium metal–organic framework with stable luminescent emission in wide pH range that acts as a quantitative detection material for nitroaromatics

Jinzeng Wang,<sup>a</sup> Wei Sun,<sup>a</sup> Siyuan Chang,<sup>a</sup> Houting Liu,<sup>a</sup> Guonan Zhang,<sup>a</sup>  
Yanqin Wang,<sup>a</sup> Zhiliang Liu\*<sup>a,b</sup>

College of Chemistry and Chemical Engineering, Key Lab of Nanoscience  
and Nanotechnology, Inner Mongolia University, Hohhot, 010021, P. R.  
China \*Corresponding author. Fax: +86-471-4992147 Tel: +86-471-  
4995414

E-mail addresses: cezliu@imu.edu.cn (Z. L. Liu)

#### 1. Crystal data collections, structure refinements, bond lengths [Å] and angles [°] for Tb-MOF

Table S1. Crystal data and structure refinement for Tb-MOF

| Compound                                    | Tb-MOF                                                            |
|---------------------------------------------|-------------------------------------------------------------------|
| Formula                                     | C <sub>20</sub> H <sub>18</sub> N <sub>2</sub> O <sub>12</sub> Tb |
| Formula weight                              | 637.28                                                            |
| Crystal system                              | Trigonal                                                          |
| Space group                                 | R-3                                                               |
| a (Å)                                       | 29.4783(15)                                                       |
| b (Å)                                       | 29.4783(15)                                                       |
| c (Å)                                       | 14.1301(8)                                                        |
| V (Å <sup>3</sup> )                         | 10633.6(9)                                                        |
| Z                                           | 18                                                                |
| $\rho_{\text{calc}}$ (mg·mm <sup>-3</sup> ) | 1.791                                                             |
| F(000)                                      | 5634                                                              |
| $\mu$ (mm <sup>-1</sup> )                   | 15.320                                                            |
| T(K)                                        | 293                                                               |
| $\Theta$ range                              | 3.00-67.23                                                        |

|                                           |                                |
|-------------------------------------------|--------------------------------|
| Reflections collected /unique             | 21999 / 4235 [R(int) = 0.0725] |
| Final R indices [I>2σ]                    | 0.0399                         |
| Final wR indices (F <sup>2</sup> ) [I>2σ] | 0.0841                         |
| Goodness of fit                           | 1.025                          |
| Max/min Δρ(e Å <sup>-3</sup> )            | 1.054 and -0.813               |

**Table S2. Selected bond lengths [Å] and angles [°] for Tb-MOF**

|                   |            |                   |            |
|-------------------|------------|-------------------|------------|
| Tb(1)-O(6)        | 2.271(4)   | Tb(1)-O(1)        | 2.425(4)   |
| Tb(1)-O(7)G       | 2.305(4)   | Tb(1)-O(2)        | 2.481(4)   |
| Tb(1)-O(4)        | 2.306(4)   | Tb(1)-O(10)       | 2.506(4)   |
| Tb(1)-O(5)G       | 2.388(4)   |                   |            |
| Tb(1)-O(9)        | 2.421(4)   |                   |            |
| O(6)-Tb(1)-O(7)G  | 151.95(15) | O(9)-Tb(1)-O(1)   | 129.46(13) |
| O(6)-Tb(1)-O(4)   | 95.35(14)  | O(6)-Tb(1)-O(2)   | 77.69(14)  |
| O(7)G-Tb(1)-O(4)  | 83.14(15)  | O(7)G-Tb(1)-O(2)  | 127.07(13) |
| O(6)-Tb(1)-O(5)G  | 76.53(15)  | O(4)-Tb(1)-O(2)   | 70.84(14)  |
| O(7)G-Tb(1)-O(5)G | 119.86(14) | O(5)G-Tb(1)-O(2)  | 73.55(14)  |
| O(4)-Tb(1)-O(5)G  | 144.39(15) | O(9)-Tb(1)-O(2)   | 144.86(14) |
| O(6)-Tb(1)-O(9)   | 83.63(15)  | O(1)-Tb(1)-O(2)   | 52.91(12)  |
| O(7)G-Tb(1)-O(9)  | 80.38(15)  | O(6)-Tb(1)-O(10)  | 77.10(15)  |
| O(4)-Tb(1)-O(9)   | 141.10(14) | O(7)G-Tb(1)-O(10) | 76.25(15)  |
| O(5)G-Tb(1)-O(9)  | 73.29(15)  | O(4)-Tb(1)-O(10)  | 68.98(13)  |
| O(6)-Tb(1)-O(1)   | 129.23(14) | O(5)G-Tb(1)-O(10) | 138.91(14) |
| O(7)G-Tb(1)-O(1)  | 78.30(13)  | O(9)-Tb(1)-O(10)  | 72.95(13)  |
| O(4)-Tb(1)-O(1)   | 80.31(13)  | O(1)-Tb(1)-O(10)  | 141.93(13) |
| O(5)G-Tb(1)-O(1)  | 78.74(13)  | O(2)-Tb(1)-O(10)  | 129.62(13) |

G: 2/3-x+y, 4/3-x, 1/3+z.

## 2. The contrast PXRD and luminescence emission spectra of as made and

activated samples.

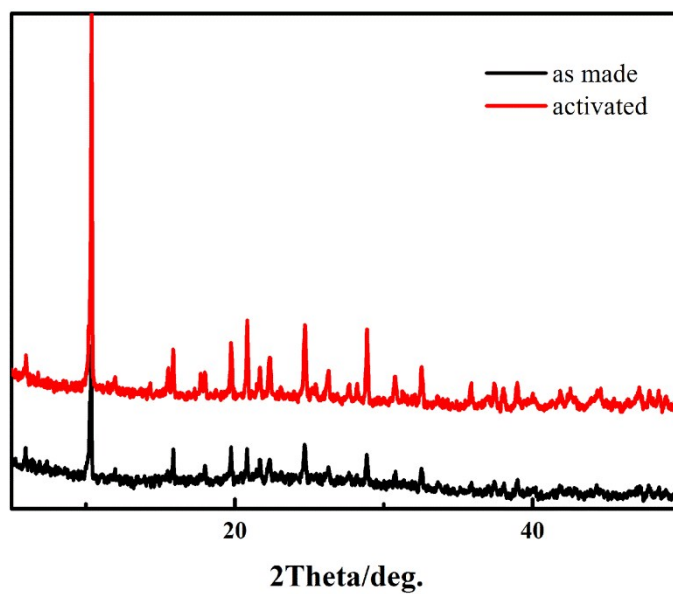

Fig. S1 PXRD of as made samples and activated samples

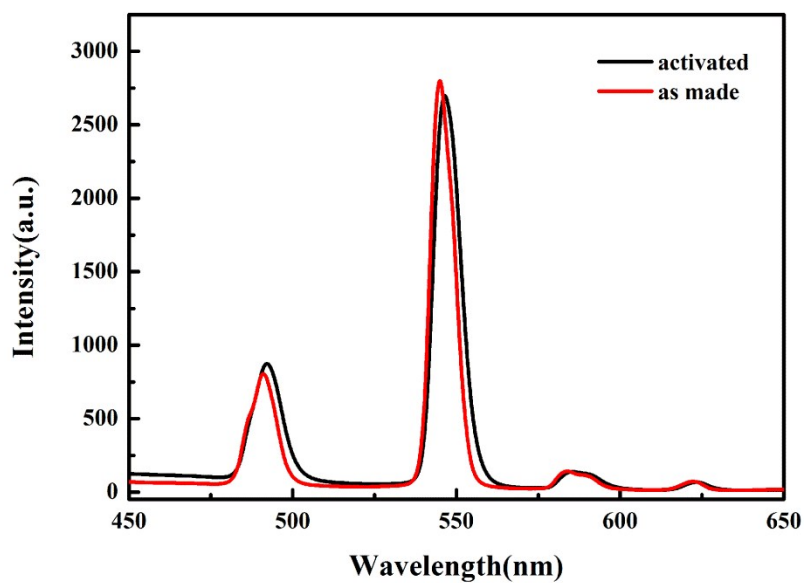

Fig. S2 the luminescence emission spectra of as made and activated samples

### 3. The PXRD of samples immersed in different pH

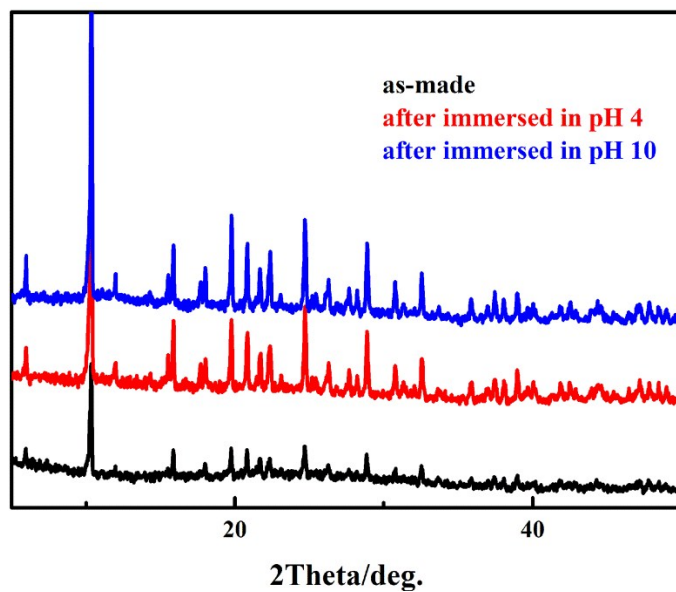

Fig. S3 The PXRD of samples immersed in different pH

4. The Concentration dependent luminescence for the Tb-MOF dispersed in m-DNB

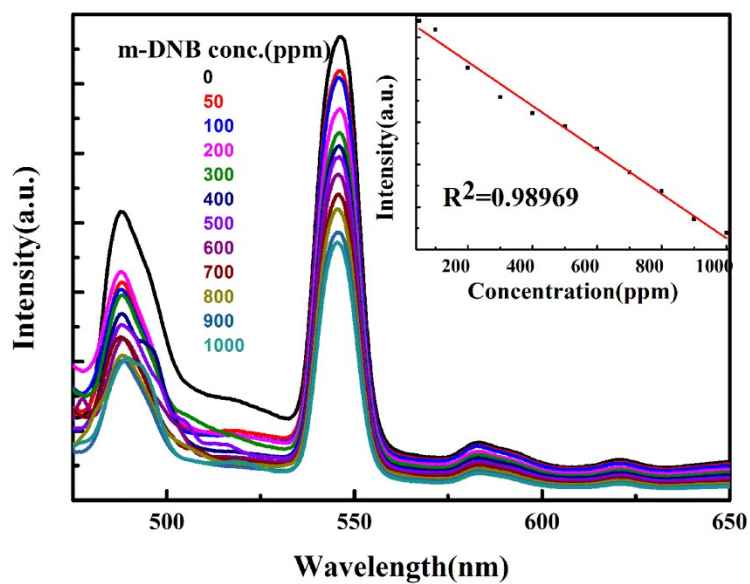

Fig. S4 Concentration dependent luminescence for the Tb-MOF dispersed in dinitrobenzene (m-DNB)

5. The IR spectra

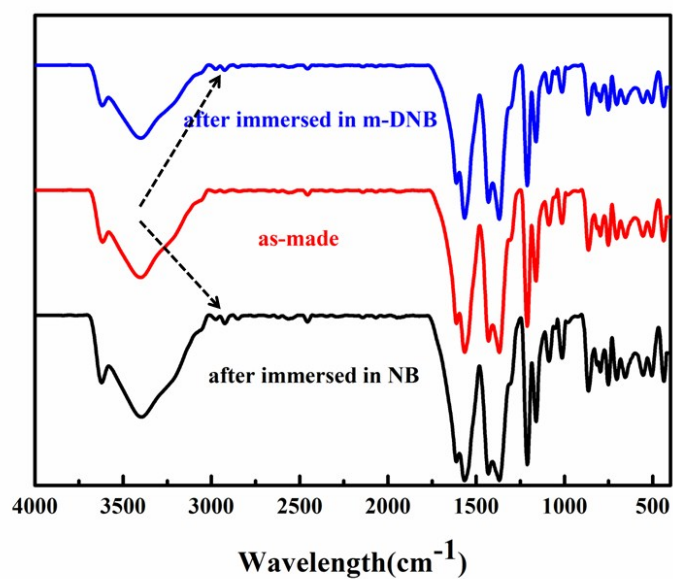

Fig. S5 Infrared spectra of the as-made sample of Tb-MOF (red), Tb-MOF after immersed in m-DNB (blue), Tb-MOF after immersed in NB.

## 6. The UV-vis spectra of analytes in ethanol

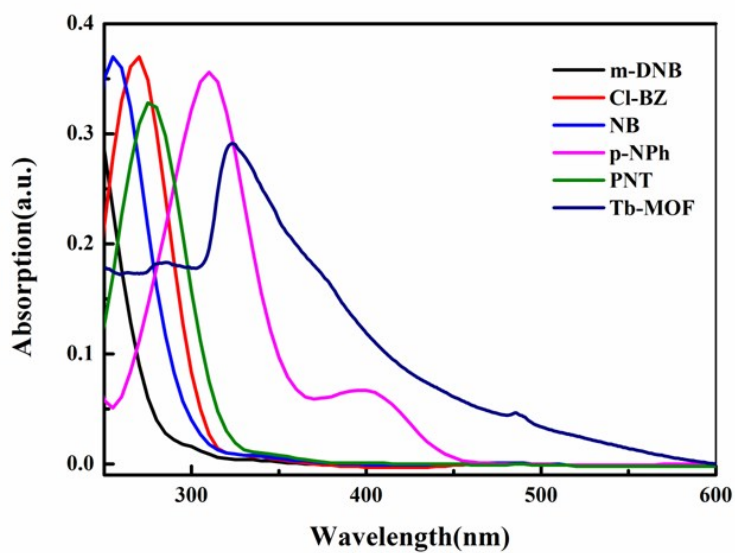

Fig. S6 The UV-vis spectra of analytes in ethanol
